# Supplementary material for: British Thoracic Society quality standards for home oxygen use in adults
Source: PubMed Central journal article supplement — BMJ Open Respir Res. 2017 Sep 18;4(1):e000223. doi: 10.1136/bmjresp-2017-000223 (PMC5623332; doi:10.1136/bmjresp-2017-000223), 2017-09-18
Supplement: bmjresp-2017-000223supp002.pdf [file bmjresp-2017-000223supp002.pdf]

## **BTS Quality Standards for Home Oxygen Use in Adults**

### **Appendix 2**

#### **NICE 2010 COPD Referral Criteria**

1.2.5.4 The need for oxygen therapy should be assessed in:

- all patients with very severe airflow obstruction (FEV1 < 30% predicted)
- patients with cyanosis
- patients with polycythaemia
- patients with peripheral oedema
- patients with a raised jugular venous pressure
- patients with oxygen saturations  $\leq$  92% breathing air.

Assessment should also be considered in patients with severe airflow obstruction (FEV1 30–49% predicted). [2004]
