# Supplementary material for: British Thoracic Society quality standards for home oxygen use in adults
Source: PubMed Central journal article supplement — BMJ Open Respir Res. 2017 Sep 18;4(1):e000223. doi: 10.1136/bmjresp-2017-000223 (PMC5623332; doi:10.1136/bmjresp-2017-000223), 2017-09-18
Supplement: bmjresp-2017-000223supp004.pdf [file bmjresp-2017-000223supp004.pdf]

**BTS Quality Standards for Home Oxygen Use in Adults**

**Appendix 4**

**Example assessment referral form from BTS Home Oxygen Guideline (2015)**

| <b>HOME OXYGEN ASSESSMENT REFERRAL FORM</b>                                                                       |                                                                                                                         |
|-------------------------------------------------------------------------------------------------------------------|-------------------------------------------------------------------------------------------------------------------------|
| NHS no:<br>Name:<br>Address:<br><br>Post code:<br>Date of birth:                                                  | Tel No:<br><br>Key contact (if different from patient):<br>Name:<br>Relationship:<br>Tel No:                            |
| GP name & address:                                                                                                |                                                                                                                         |
| Consultant name & address (if applicable):                                                                        |                                                                                                                         |
| Primary diagnosis:                                                                                                |                                                                                                                         |
| Relevant secondary diagnoses:                                                                                     |                                                                                                                         |
| Oxygen saturation (on air at rest): <span style="float: right;">Date taken:</span>                                |                                                                                                                         |
| Blood gases:    pH            PO2            PCO2            (on air   on oxygen   please circle)<br>if available |                                                                                                                         |
| Date of last exacerbation (treatment completed):                                                                  |                                                                                                                         |
| Is patient being discharged from hospital?                                                                        |                                                                                                                         |
| Smoking status (tick):                                                                                            | Never <input type="checkbox"/> Ex <input type="checkbox"/> , how long stopped .....<br>Current <input type="checkbox"/> |
| Other potential hazards<br>(tick any that may apply):                                                             | Lives alone <input type="checkbox"/> Mobility issues (trips/falls) <input type="checkbox"/>                             |
|                                                                                                                   | Open fires <input type="checkbox"/> Poor memory <input type="checkbox"/>                                                |
|                                                                                                                   | Other <input type="checkbox"/> (list)                                                                                   |
| Allergies:                                                                                                        | No <input type="checkbox"/> Yes <input type="checkbox"/> list any:                                                      |
| Does the patient currently have any home oxygen?    No <input type="checkbox"/> Yes <input type="checkbox"/>      |                                                                                                                         |
| Details                                                                                                           |                                                                                                                         |
| Is the patient or key contact aware of this referral?    No <input type="checkbox"/> Yes <input type="checkbox"/> |                                                                                                                         |
| Additional relevant information:                                                                                  |                                                                                                                         |
| Print Name:                                                                                                       | Profession:                                                                                                             |
| Signature:                                                                                                        | Date:                                                                                                                   |
